# Supplementary material for: Microbial Consortia for Effective Biocontrol of Root and Foliar Diseases in Tomato
Source: Front Plant Sci. 2021 Nov 5;12:756368. doi: 10.3389/fpls.2021.756368 (PMC8602810; doi:10.3389/fpls.2021.756368)
Supplement: Supplementary file 2 [file Data_Sheet_2.xlsx]

## Sheet: Supl.Table 1
Supplementary Table 1. Summary of the most relevant literature on BCAs used in the present study.
Microorganism	Assay	Pathogen/Pest	Effect	Reference
Bacillus amyloliquefaciens CECT8238	In vitro antagonism	Botrytis cinerea	+	García-Gutiérrez et al., 2012
		Fusarium oxysporum	+
		Acidovorax avenae subsp. Avenae	0	Zeriouh et al., 2011
		Pectobacterium carotovorum subsp. Carotovorum	+
		Xanthomonas campestris pv. Cucurbitae	+
		X. campestris pv. Melonis	+
	In planta antagonism	Pectobacterium carotovorum	+	Zeriouh et al., 2014,
		Xanthomonas campestris	+
		Podosphaera fusca	+	Romero et al., 2004; 2007; Zeriouh et al., 2014
		Pectobacterium carotovorum subsp. Carotovorum	+	Magno-Perez-Bryan et al., 2015
		Podospaera xanthii	+
	ISR	Podosphaera fusca	+	García-Gutiérrez et al., 2012
Bacillus amyloliquefaciens CECT8237	In vitro antagonism	Botrytis cinerea	+	García-Gutiérrez et al., 2012
		Fusarium oxysporum	+
		Acidovorax avenae subsp. Avenae	+	Zeriouh et al., 2011
		Pectobacterium carotovorum subsp. Carotovorum	+
		Xanthomonas campestris pv. Cucurbitae	+
		X. campestris pv. Melonis	+
	In planta antagonism	Podosphaera fusca	+	Romero et al., 2004; 2007
		Pectobacterium carotovorum subsp. Carotovorum	+	Magno-Perez-Bryan et al., 2015
		Podospaera xanthii	+
	ISR	Podosphaera fusca	+	García-Gutiérrez et al., 2012; 2013
Pseudomonas azotoformans	ISR	Colletotrichum orbiculare	+	Sang et al.,2014
		Botrytis cinerea	+	Bouaoud et al.,2017
Pseudomonas chororaphis MA342	In planta antagonism	Verticillium longisporum	+	Abuamsha et al., 2011
		Drechslera teres	+	Tombolini et al., 1999
		Pseudomonas syringae pv. Syringae	0	Gilardi et al., 2010
	ISR	Leptosphaeria maculans	+	Abuamsha et al., 2011
Trichoderma harzianum T22	In planta antagonism	Rhizoctonia solani	+	Wilson et al., 2008; Roberti et al., 2015; Fatouros et al.,2018
		Pythium ultimum	+	Fatouros et al.,2018
		Sclerotinia sclerotiorum	+
		Armillaria mellea	+	Percival et al, 2011
	ISR	Fusarium oxysporum	+	Martinez-Medina et al., 2014
		Botrytis cinerea	+	Tucci et al., 2011
		Cucumber mosaic virus	+	Vitti et al., 2016
		Meloidogyne incognita	+	Pocurull et al., 2020
		Nezara viridula	+	Alınç et al., 2021
		Macrosiphum euphorbiae	+	Coppola et al., 2017, 2019
Trichoderma harzianum ESALQ1306	In vitro antagonism	Leucoagaricus gongylophorus	+	Nascimento et al., 2017
	In planta antagonism	Sclerotinia sclerotiorum	+	Geraldine et al., 2013
	ISR	Tetranichus urticae	+	Canassa et al., 2019
			0
Rhizophagus irregularis	ISR	Botrytis cinerea	+	Sanchez-Bel et al., 2016; Sanmartín et al., 2020

## Sheet: Suppl.Table 2
Supplementary Table 2. Composition of synthetic microbial consortia and concentration of beneficial microorganisms used in in planta bioassays.
	Suppression F. oxysporum					Suppresion B. cinerea					ISR against B. cinerea					Strains - Compatibility
	Single	SynCom1A	SynCom1B	SynCom2A	SynCom2B	Single	SynCom1A	SynCom1B	SynCom2A	SynCom2B	Single	SynCom1A +AMF	SynCom1B +AMF	SynCom2A+AMF	SynCom2B +AMF	Single	SynCom1A	SynCom1A +AMF	SynCom2A	SynCom2A +AMF
B. amyloliquefaciens CECT 8238	1 x 10⁷ cfu/ plant	1 x 10⁷ cfu/ plant	3.3 x 10⁶ cfu/ plant	1 x 10⁷ cfu/ plant	1.7 x 10⁶ cfu/ plant	1 x 10⁷ cfu/ ml	1 x 10⁷ cfu/ ml	3.3 x 10⁶ cfu/ ml	1 x 10⁷ cfu/ ml	1.7 x 10⁶ cfu/ ml	1 x 10⁷ cfu/ plant	1 x 10⁷ cfu/ plant	3.3 x 10⁶ cfu/ plant	1 x 10⁷ cfu/ plant	1.7 x 10⁶ cfu/ plant	1 x 10⁷ cfu/ plant (4 x 10⁵ cfu/g of soil)	1 x 10⁷ cfu/ plant (4 x 10⁵ cfu/g of soil)	1 x 10⁷ cfu/ plant (4 x 10⁵ cfu/g of soil)	1 x 10⁷ cfu/ plant (4 x 10⁵ cfu/g of soil)	1 x 10⁷ cfu/ plant (4 x 10⁵ cfu/g of soil)
P. azotoformans F30A
T. harzianum T22
B.amyloliquefaciens CECT 8237		NA	NA				NA	NA				NA	NA				NA	NA
P. chlororaphis MA 342
T. harzianum ESALQ1306
R. irregularis MUCL 57021	NA			NA		NA			NA		1000 spores/plant					1000 spores/ plant		1000 spores/ plant	NA	1000 spores/ plant
